# Supplementary material for: An integrated sensing and wireless communications platform for sensing sodium in sweat
Source: Royal Society of Chemistry journal article supplement (doi:10.1039/c5ay02254a), 2015-10-23

---

## **Supplementary Information**

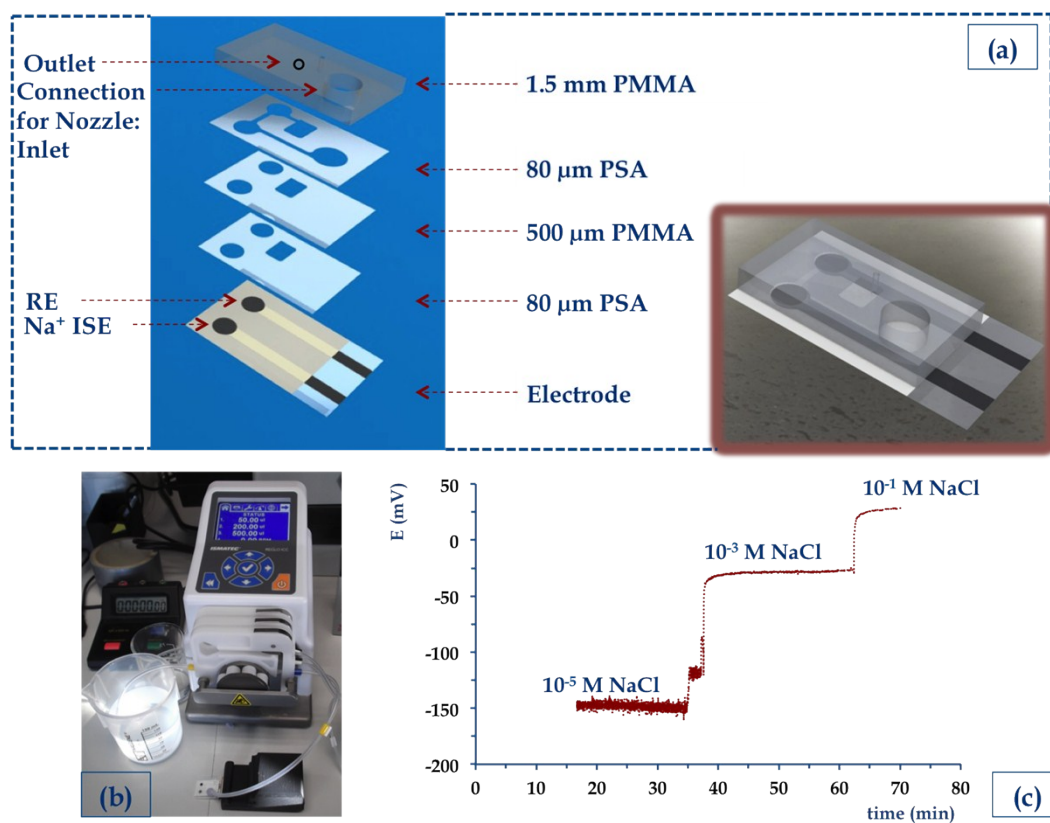

**Figure SID. 1:** (a) 1<sup>st</sup> generation of the Microfluidic unit integrated on top of the screen-printed electrodes and (b) the experimental set-up used to carry out the first on-bench tests (i.e. potentiometric strip connected to a peristaltic pump). (c) Example of a three-point calibration curve realised using the set-up in (b).

**Figure SID. 2:** Views of the wearable PotMicroChip worn on the upper arm

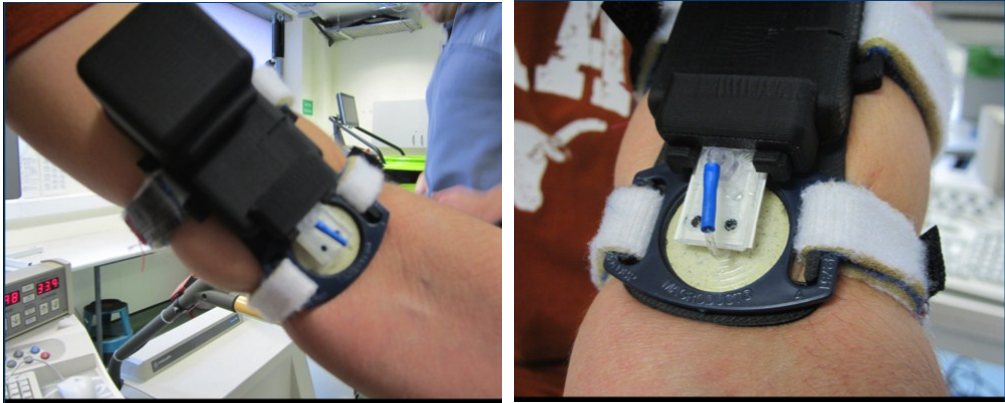

Supplement: c5ay02254a1.pdf [file c5ay02254a1.pdf]
